# Supplementary material for: Serotonergic gene-to-gene interaction is associated with mood and GABA concentrations but not with pain-related cerebral processing in fibromyalgia subjects and healthy controls
Source: Springer Nature journal article supplement (doi:10.1186/s13041-021-00789-4), 2021-05-12

STAI-S

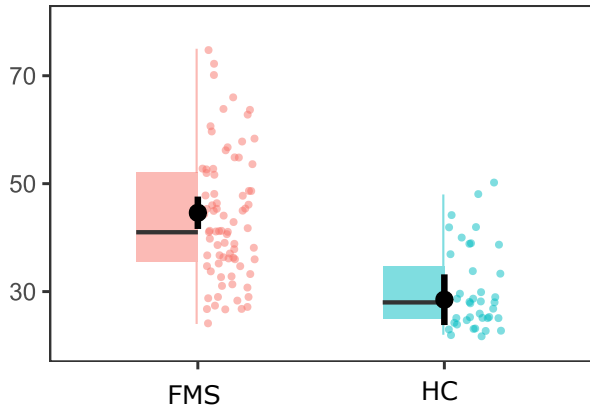

STAI-T

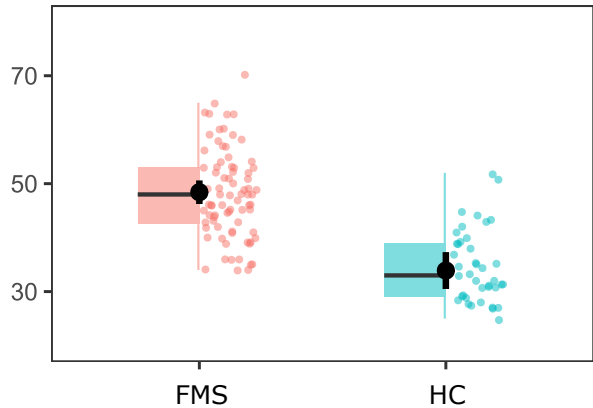

Supplement: MOESM3 [file 13041_2021_789_MOESM3_ESM.pdf]
