# Supplementary material for: Serotonergic gene-to-gene interaction is associated with mood and GABA concentrations but not with pain-related cerebral processing in fibromyalgia subjects and healthy controls
Source: Springer Nature journal article supplement (doi:10.1186/s13041-021-00789-4), 2021-05-12

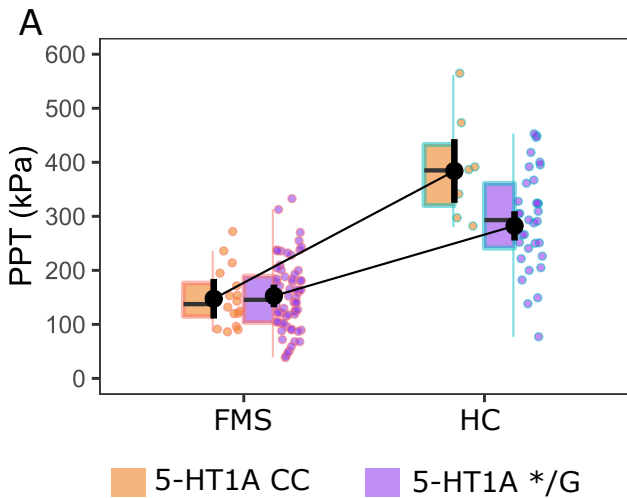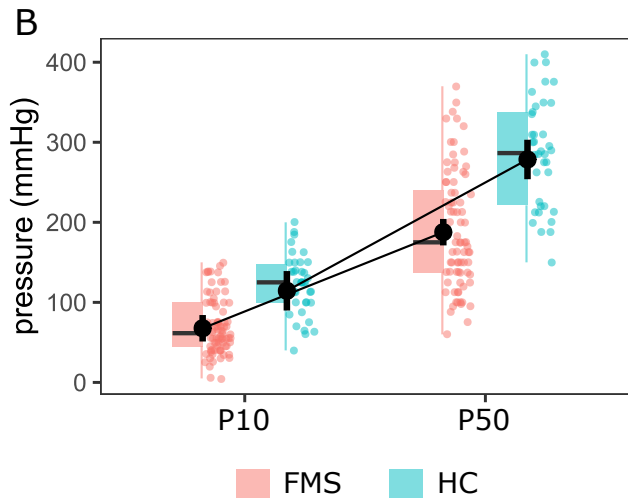

Supplement: MOESM4 [file 13041_2021_789_MOESM4_ESM.pdf]
